# Supplementary material for: Preparation and evaluation of the microwave absorption properties of template-free graphene foam-supported Ni nanoparticles
Source: Royal Society of Chemistry journal article supplement (doi:10.1039/c6ra27435h), 2017-01-01
Supplement: c6ra27435h1.pdf [file c6ra27435h1.pdf]

## Supporting Information

Preparation and Microwave absorption property of template-free  
graphene foam-supported Ni nanoparticles composites

Liangliang Xiong, Mei Yu\*, Jianhua Liu, Songmei Li, Bing Xue

School of Material Science and Engineering, Beihang University, Beijing 100191, China

\*E-mail: yumei@buaa.edu.cn

For GFN<sub>7</sub> and GFN<sub>9</sub>, the 7 and 9 mean that the weight percentage contents of nickel in the GFN<sub>7</sub> and GFN<sub>9</sub> are 70% and 90%, respectively. Fig.S1 is the SEM images of GFN<sub>7</sub> and GFN. It is clearly seen that GFN<sub>7</sub> have small volume and low Ni content compared with GFN. In addition, as shown in Fig.S2, the 3D structure doesn't be kept after the hydrothermal and freeze-drying process for GFN<sub>9</sub>. It may be caused by the excessive content of Ni. Fig.S3 displays the two-dimensional contour plots of RL versus frequency and thickness for GFN and GFN<sub>7</sub>. It is worth noting that the bandwidth of RL<-20dB (99% absorption) of GFN is larger than that of GFN<sub>7</sub>. And the maximum RL of GFN<sub>7</sub> is -41dB at 11GHz with the thickness of 3.75mm, which is weaker than that of GFN (-49dB). Hence, the GFN is used to compare with other specimens and research the mechanism of microwave absorption in this work.

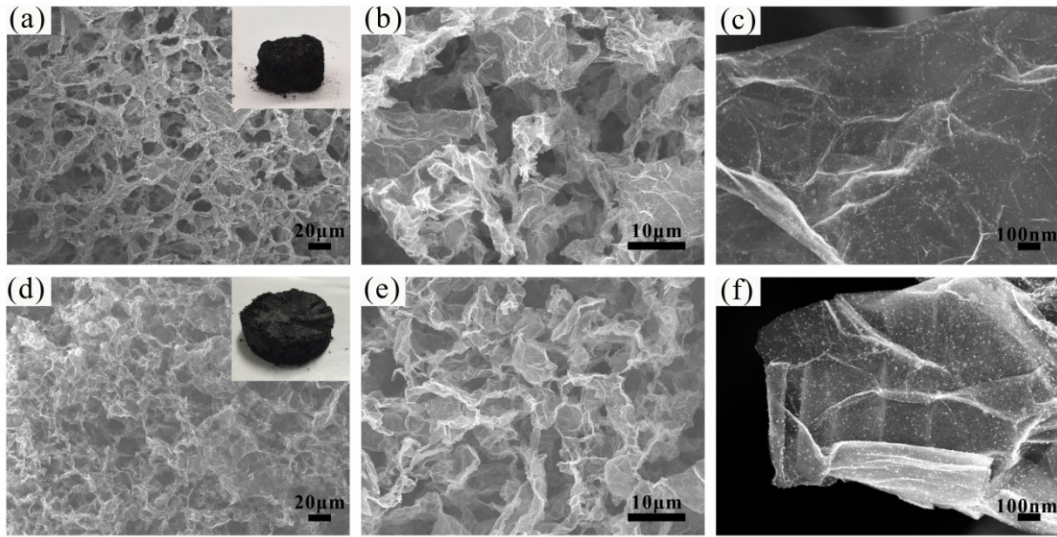

**Fig. S1** SEM images of (a-c) GFN<sub>7</sub>, (d-f) GFN

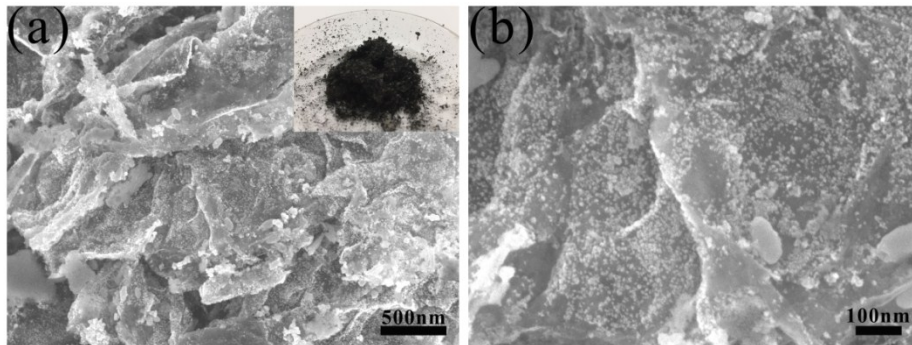

**Fig.S2** SEM images of GFN<sub>9</sub>

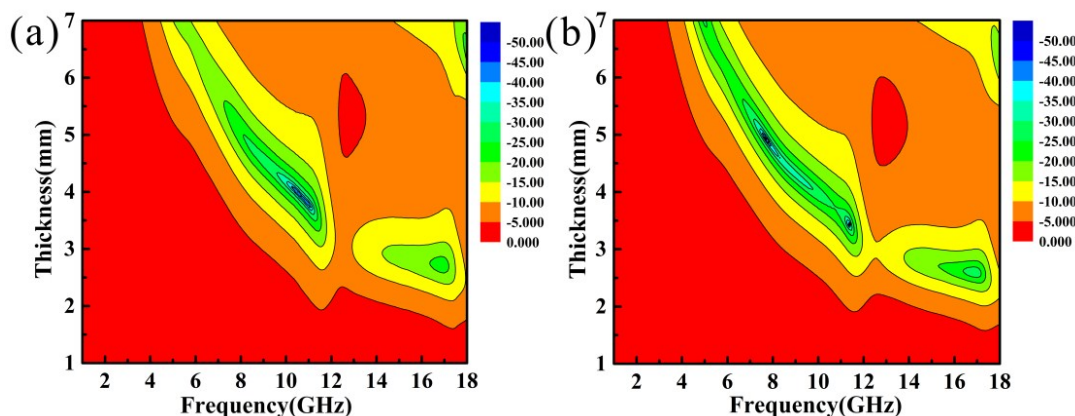

**Fig. S3** Contour maps of RL versus frequency and thickness for GFN<sub>7</sub> and GFN

Fig. S4 shows the XRD patterns of Ni nanoparticles, Ni(OH)<sub>2</sub> nanoparticles and the graphene-supported Ni(OH)<sub>2</sub> nanoparticles composites (GFNH) composite according to the synthetic route mentioned in the experimental section. The peaks of GFNH composite match well with the characteristic peaks of the hexagonal theophrastite in the range of 10-80° corresponding to the standard card no. 14-0117, and the broad peak at around 25.6° corresponds to the characteristic diffraction peak (002) of rGO. After calcination of synthetic Ni(OH)<sub>2</sub> nanoparticles at the H<sub>2</sub>/Ar atmosphere, the XRD pattern of calcinated specimen shows high degree of crystallinity and can be readily indexed to the face-centered cubic Ni phase (JCPDS card no. 87-0712).

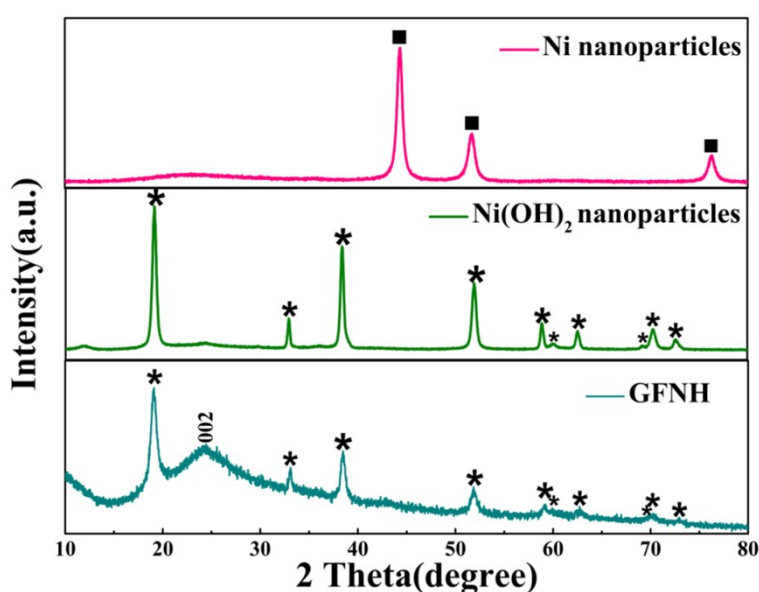

**Fig.S4** XRD patterns of Ni nanoparticles, Ni(OH)<sub>2</sub> nanoparticles and GFNH

The magnetic hysteresis loops of GFNO and GFN are measured at room temperature using the vibrating sample magnetometer (VSM), as shown in Fig. S5. The hysteresis loop of GFN reveals that it's a typical soft magnetic material and has strong ferromagnetic nature. The saturation magnetization ( $M_s$ ) of GFN is 12.5emu/g and far less than that of bulk nickel (55emu/g) due to the small particle size and the presence of non-magnetic graphene foam.<sup>1</sup> The remanent magnetization ( $M_r$ ) and coercivity ( $H_c$ ) of GFN are 1.99emu/g and 103Oe, respectively. Soft magnetic materials possess the characteristics of easy magnetization and demagnetization, and could convert electromagnetic energy into heat energy, which is beneficial to scatter the microwave.<sup>2</sup> However, as shown in the inset of Fig. S5, the  $M_s$ ,  $M_r$  and  $H_c$  of GFNO composite are  $4.85 \times 10^{-4}$  emu/g, 5.15emu/g and 154Oe, respectively. The result indicates that GFNO shows superparamagnetism and weak ferromagnetism in room temperature, as well as the contribution towards the magnetic moment arising from other sources such as the presence of non-stoichiometry and/or  $\text{Ni}^{3+}$  ions.<sup>3-5</sup>

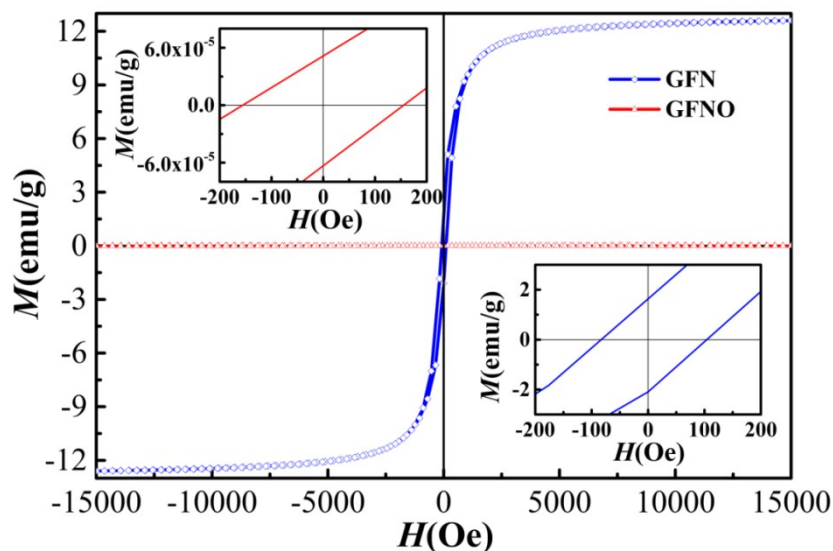

**Fig. S5** Hysteresis loops of the GFN and GFNO measured at room temperature

## Notes and references

1. X. F. Liu, X. R. Cui, Y. X. Chen, X. J. Zhang, R. H. Yu, G. S. Wang and H. Ma, *Carbon*, 2015, **95**, 870.
2. Z. Zhu, X. Sun, G. Li, H. Xue, H. Guo, X. Fan, X. Pan and J. He, *Journal of Magnetism and Magnetic Materials*, 2015, **377**, 95.
3. P. M. Ponnusamy, S. Agilan, N. Muthukumarasamy, T. S. Senthil, G. Rajesh, M. R. Venkatraman and D. Velauthapillai, *Materials Characterization*, 2016, **114**, 166.
4. N. M. Deraz, *Current Applied Physics*, 2012, **12**, 928.
5. G. Anandha Babu, Y. Hayakawa and G. Ravi, *Materials Letters*, 2015, **149**, 54.
